# Supplementary material for: n/p-Doping in a buckled honeycomb InAs monolayer using IVA-group impurities
Source: Royal Society of Chemistry journal article supplement (doi:10.1039/d3na00504f), 2024-01-01
Supplement: d3na00504f1.pdf [file d3na00504f1.pdf]

## n/p-doping in buckled honeycomb InAs monolayer using IVA-group impurities

D. M. Hoat<sup>1,2,\*</sup>, J. Guerrero-Sanchez,<sup>3</sup>

<sup>1</sup>Institute of Theoretical and Applied Research, Duy Tan University, Ha Noi 100000, Viet Nam

<sup>2</sup>Faculty of Natural Sciences, Duy Tan University, Da Nang 550000, Viet Nam

<sup>3</sup>Universidad Nacional Autónoma de México, Centro de Nanociencias y Nanotecnología, Apartado Postal 14, Ensenada, Baja California, Código Postal 22800, Mexico

\*Corresponding author: [dominhhoat@duytan.edu.vn](mailto:dominhhoat@duytan.edu.vn)

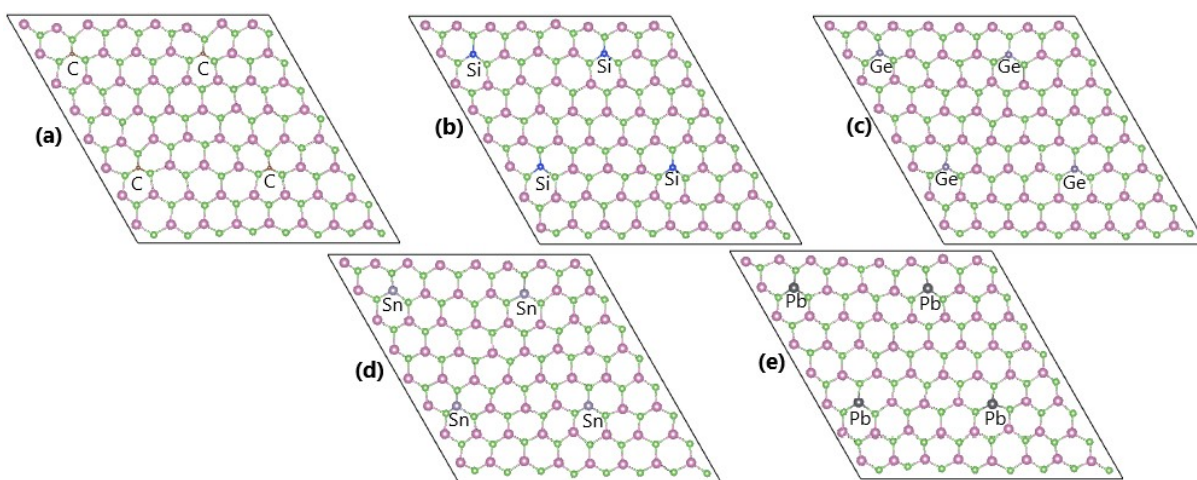

Figure S1: Atomic structure of InAs monolayer with (a)  $C_{In}$ , (b)  $Si_{In}$ , (c)  $Ge_{In}$ , (d)  $Sn_{In}$ , and (e)  $Pb_{In}$  doping after AIMD simulations.

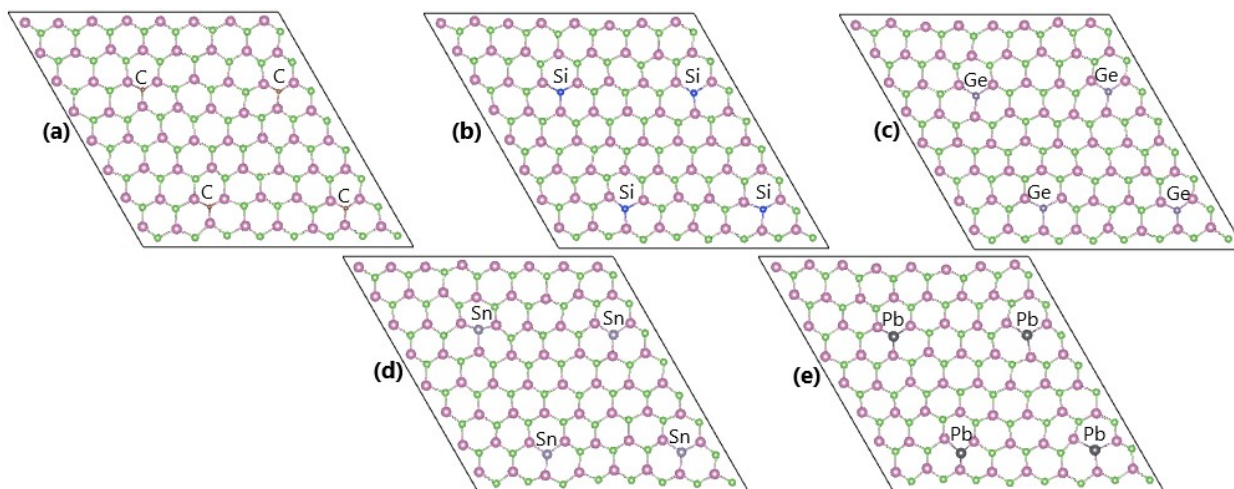

Figure S2: Atomic structure of InAs monolayer with (a)  $C_{As}$ , (b)  $Si_{As}$ , (c)  $Ge_{As}$ , (d)  $Sn_{As}$ , and (e)  $Pb_{As}$  doping after AIMD simulations.
